# Supplementary material for: Different Functional Network Connectivity Patterns in Epilepsy: A Rest-State fMRI Study on Mesial Temporal Lobe Epilepsy and Benign Epilepsy With Centrotemporal Spike
Source: PubMed Central journal article supplement (PMC8193721; doi:10.3389/fneur.2021.668856), 2021-05-28
Supplement: Data_Sheet_1.pdf [file Data_Sheet_1.pdf]

*Supplementary Material*

**Different Functional Network Connectivity Patterns in Epilepsy: A Rest-state fMRI Study on Mesial Temporal Lobe Epilepsy and Benign Epilepsy with Centrotemporal Spike**

**Supplemental Figure 1**

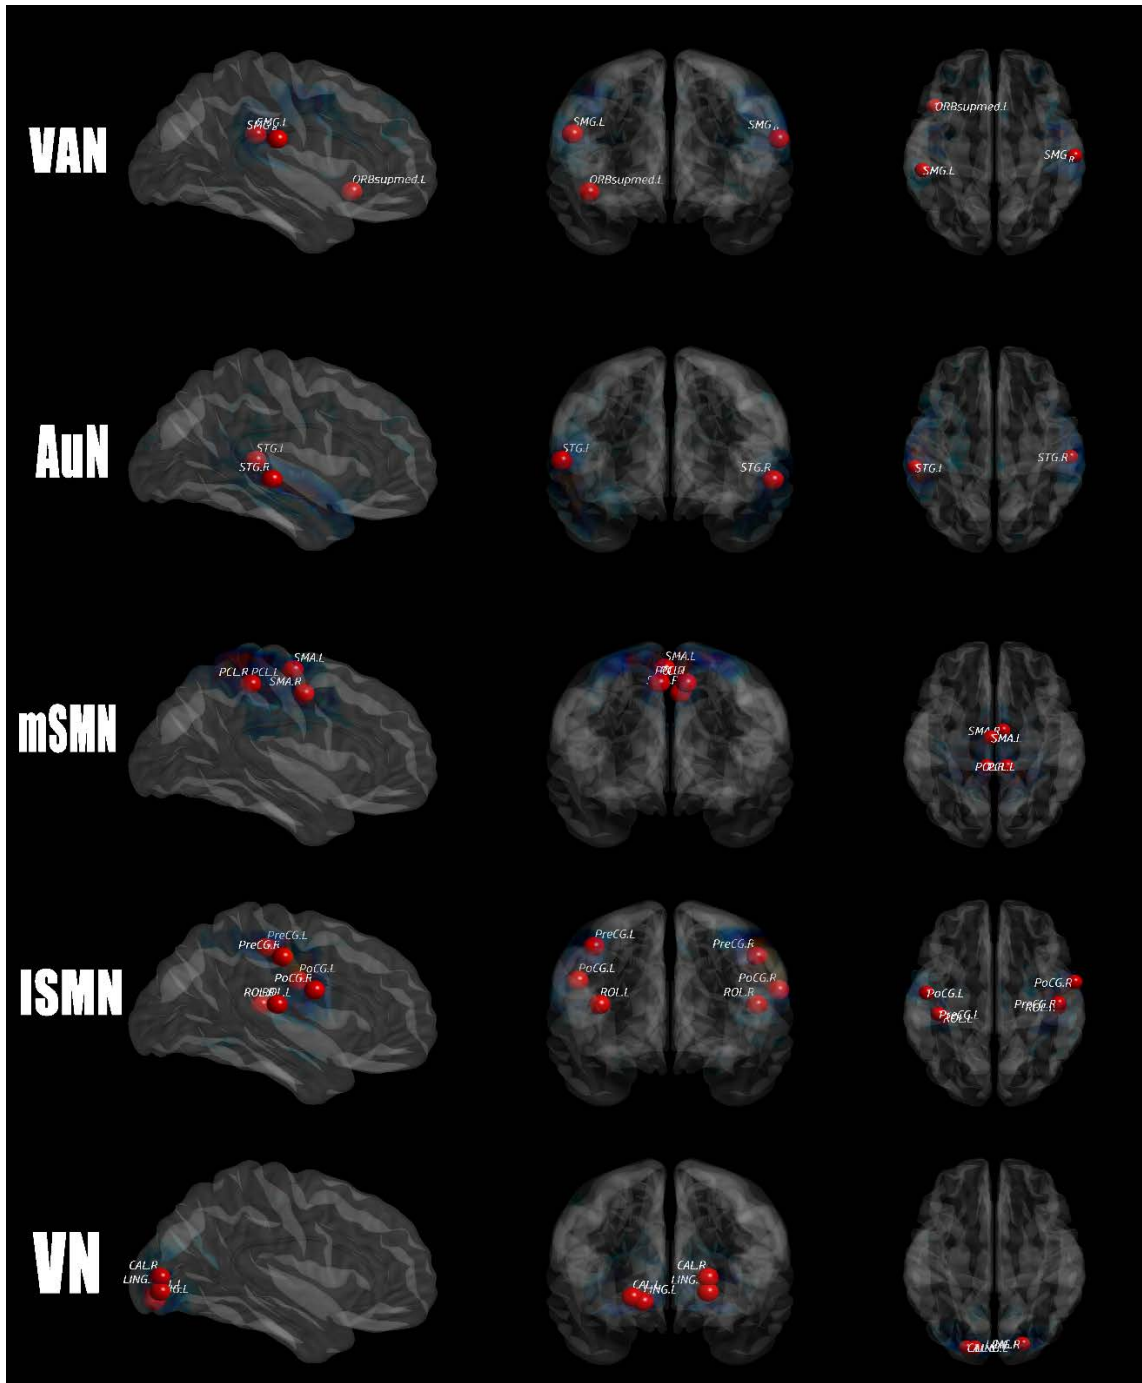

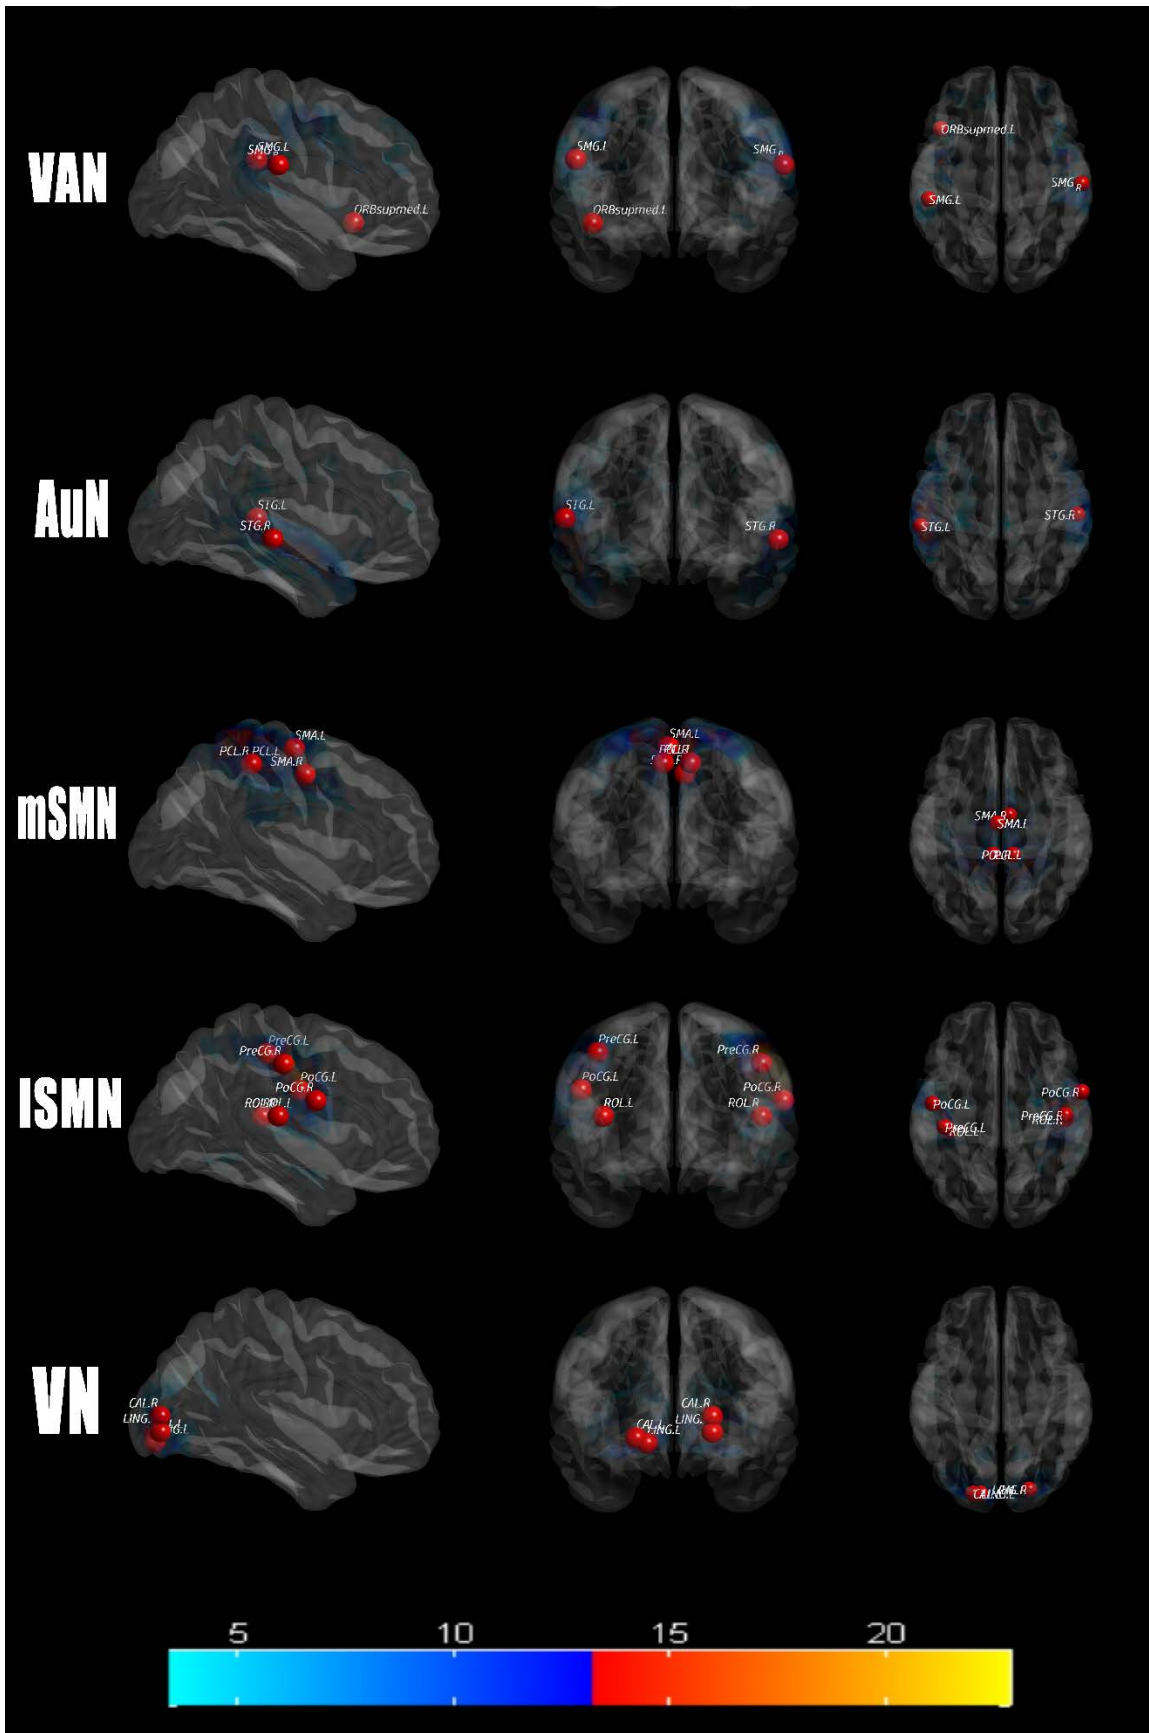

After selection by visual inspection and templates, 10 valuable components were identified. 38 regions of interest (ROIs) with a 6-mm radius sphere centred on the peak voxel in each hemisphere of RSNs. One-sample t-test showed a typical spatial pattern in each RSN, and the color bar showed the t-value in each RSN.

### Supplemental Figure 2

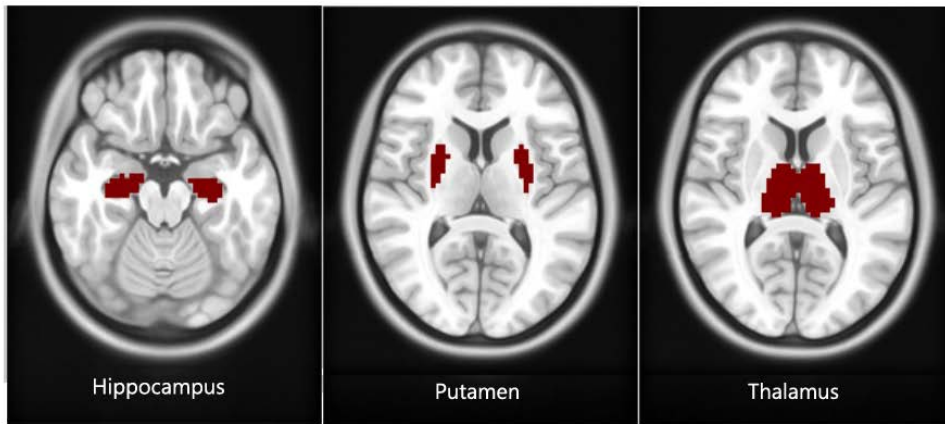

Subcortical regions of interest (ROIs) from Harvard-Oxford subcortical atlas underlying on coronal plane of the MNI152 template. In the current study, hippocampus, putamen and thalamus abbreviated as Hip, Put and Tha respectively.

### Supplemental Figure 3

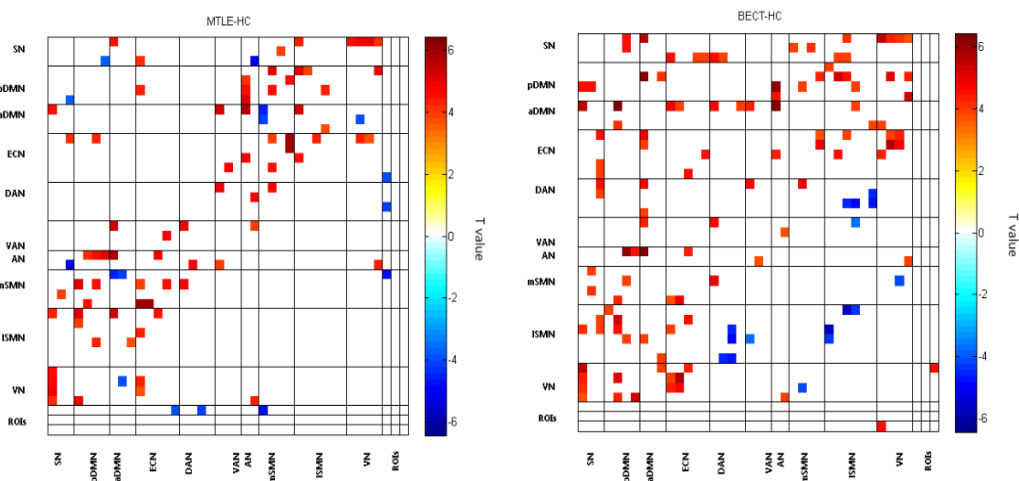

Pairwise comparisons of seeds functional connectivity in MTLE-HC and BECT-HC. Values represent  $t$ -statistic between the seeds of 10 networks and the 3 subcortical regions of interest (ROIs: bilateral hippocampus, putamen and thalamus). Warmer colors indicate that the disease group exhibited greater connectivity. Tests of statistical significance were based on two-sample  $t$ -tests corrected for multiple comparisons with a network-based statistic (NBS) threshold set to 0.05.

#### Supplemental Figure 4

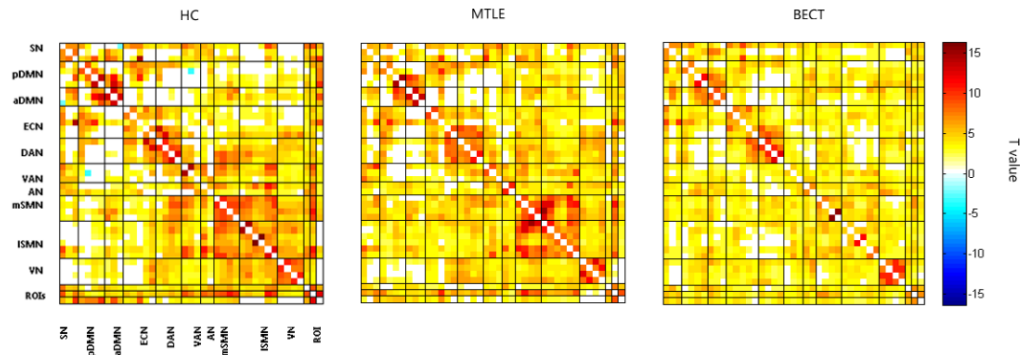

Seed-level resting state connectivity for the 3 groups. Values represent  $t$ -statistics based on the averaged  $z$ -transformed correlations between the 41 seeds of interest (see Supplemental Table 1 for specific coordinates on the seeds). Network labels are shown in the bottom left panel and are identical across all subplots. Tests of statistical significance were based on one-sample  $t$ -tests corrected for multiple comparisons with a network-based statistic (NBS) threshold set to 0.05.

#### Supplemental Table 1

| Functional networks | MTLE | BECT | HC   |
|---------------------|------|------|------|
| SN                  | 0.27 | 0.38 | 0.29 |
| pDMN                | 0.27 | 0.35 | 0.27 |
| aDMN                | 0.50 | 0.55 | 0.52 |
| ECN                 | 0.33 | 0.44 | 0.33 |
| DAN                 | 0.43 | 0.55 | 0.42 |
| VAN                 | 0.34 | 0.34 | 0.32 |
| AN                  | 0.32 | 0.31 | 0.22 |

|             |             |             |             |
|-------------|-------------|-------------|-------------|
| <b>mSMN</b> | <b>0.50</b> | <b>0.56</b> | <b>0.53</b> |
| <b>ISMN</b> | <b>0.44</b> | <b>0.41</b> | <b>0.47</b> |
| <b>VN</b>   | <b>0.67</b> | <b>0.70</b> | <b>0.85</b> |

Pearson's correlations values by Fisher z transformation within each functional network.
